# Supplementary material
Source: PubMed Central journal article supplement (PMC4046252)
Supplement: NIHMS538359-supplement-supp_tables_and_figures.pdf [file NIHMS538359-supplement-supp_tables_and_figures.pdf]

## **Supplementary Information**

### **Structural basis for diverse *N*-glycan recognition by HIV-1-neutralizing V1V2-directed antibody**

#### **PG16**

Marie Pancera, Syed Shahzad-ul-Hussan, Nicole A. Doria-Rose, Jason S. McLellan, Robert T. Bailer, Kaifan Dai, Sandra Loesgen, Mark K. Louder, Ryan P. Staupe, Yongping Yang, Baoshan Zhang, Robert Parks, Joshua Eudailey, Krissey E. Lloyd, Julie Blinn, S. Munir Alam, Barton F. Haynes, Mohammed N. Amin, Lai-Xi Wang, Dennis R. Burton, Wayne C. Koff, Gary J. Nabel, John R. Mascola, Carole A. Bewley and Peter D. Kwong

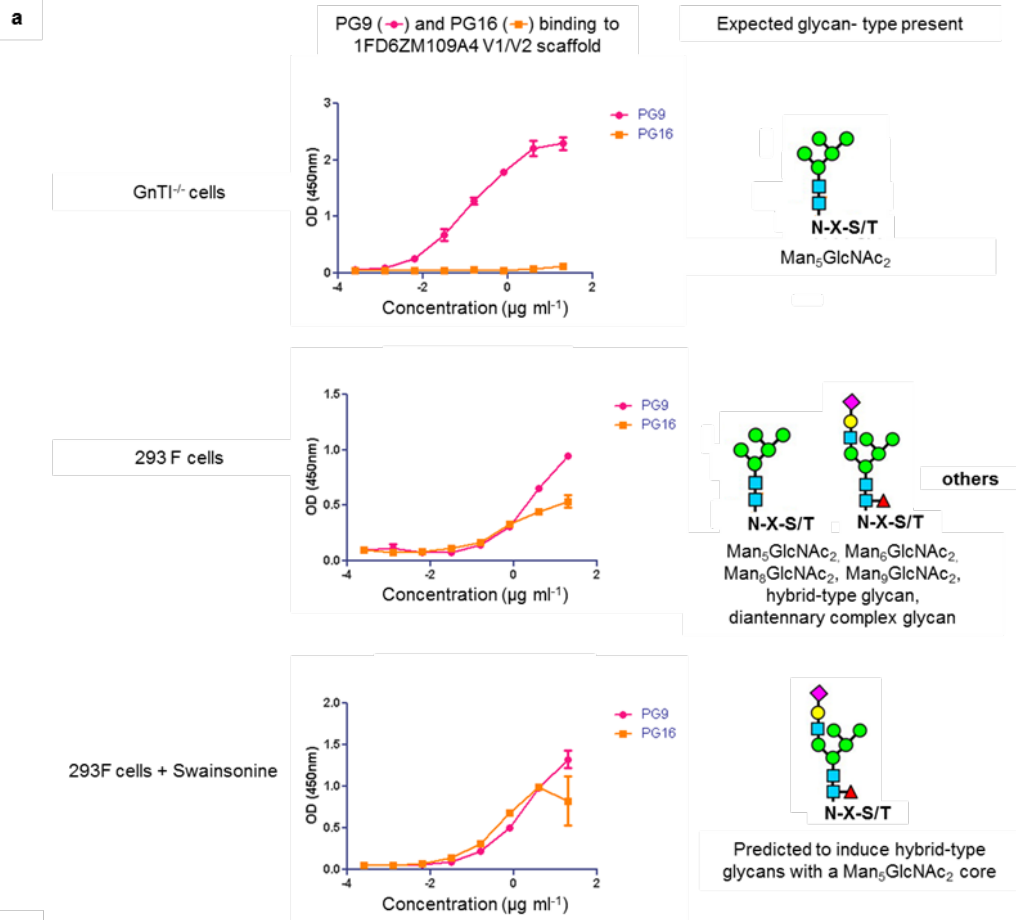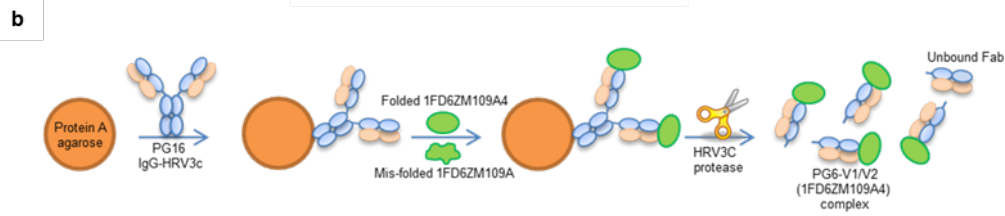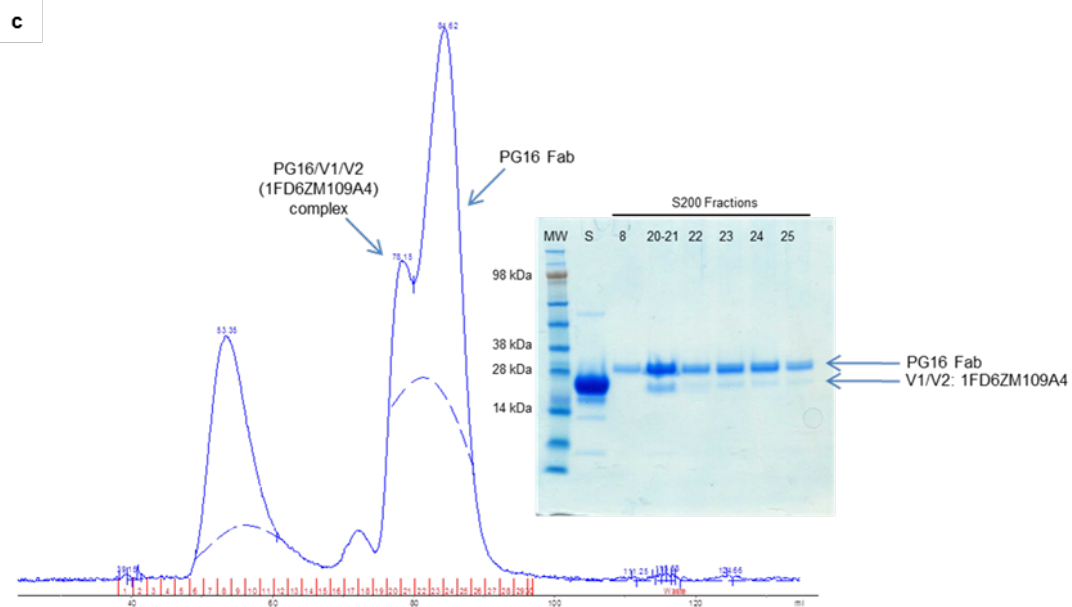

**Supplementary Figure 1 | 1FD6ZM109V1/V2 scaffold binding to PG16: characterization and purification.** **a**, ELISA Binding of PG9 and PG16 to V1/V2 scaffolds expressed in different cell lines. ELISA binding of PG9 (pink) and PG16 (orange) to scaffolded V1/V2 from strain ZM109 expressed in GnTI<sup>-/-</sup> cells (enriched in Man<sub>5</sub>GlcNAc<sub>2</sub> glycans), 293F cells or 293F cells with swainsonine added after transfection (enriched in hybrid-type glycans). On-column complex formation and purification shown in **b**, **c**. **b**, Schematic showing the on-column complex formation between PG16 and scaffolded 1FD6ZM109A4 V1/V2s, as described in Methods. **c**, Gel filtration result of the elution shown in a. A coomassie blue-stained SDS-PAGE gel is shown for fractions as indicated on the gel. MW=molecular weight standards. S = purified scaffolded V1/V2 1FD6 ZM109A4. 8 mgs of scaffolded V1/V2 1FD6ZM109A4 was used to obtain 200µgs of complex PG16/V1/V2(1FD6ZM109A4).

**a**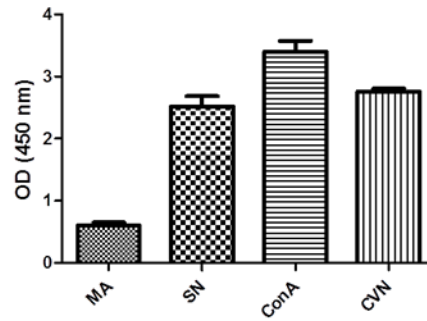**b**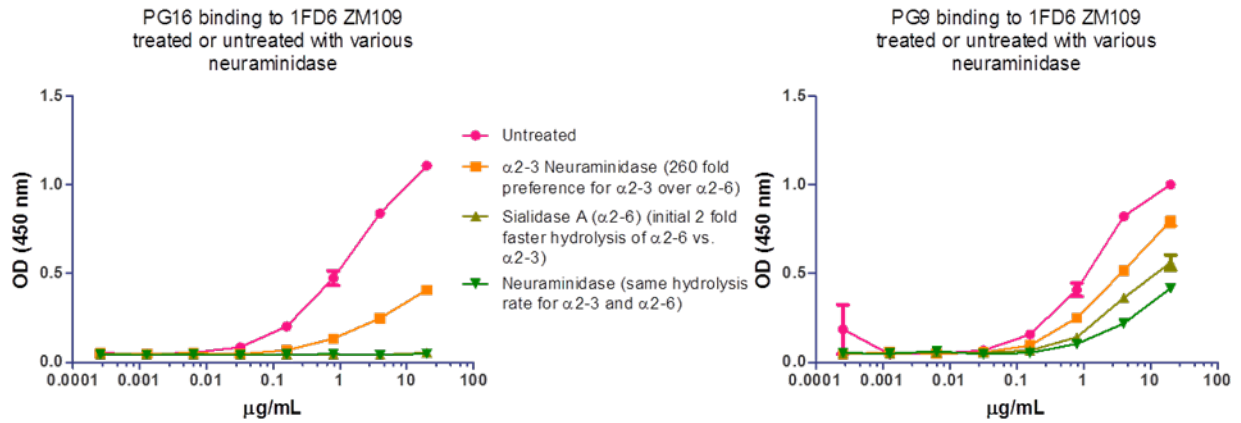**c**

MALDI-MS *m/z* 899-5000 of *N*-glycans from "1FD6ZM109A4" scaffolded V1V2

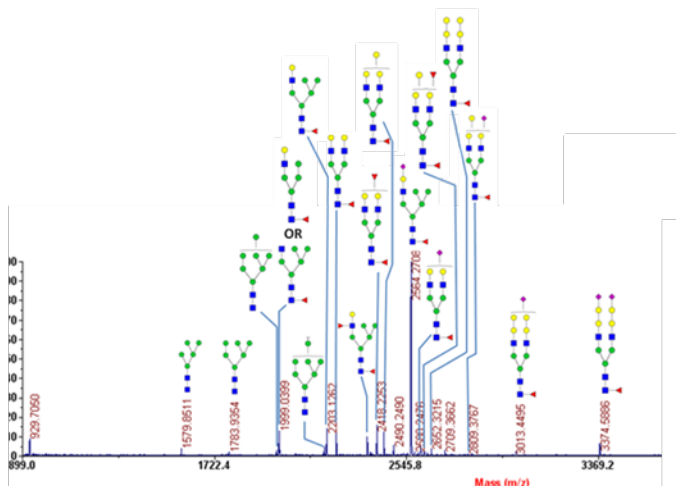**d**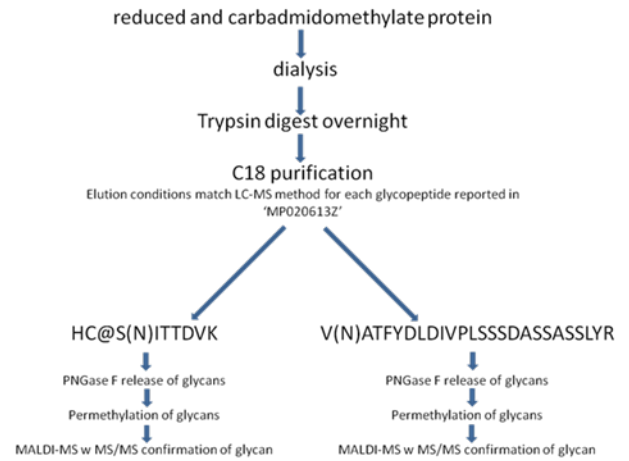

e

| Observed m/z | Proposed Structure                                       | Proposed Figure | % Peak Area Fraction N160 <sub>gp120</sub> "HC@S(N)IT TDVK" | % Peak Area Fraction N173 <sub>gp120</sub> "V(N)ATFYDL DIVPLSSDA SSASSLYR" |
|--------------|----------------------------------------------------------|-----------------|-------------------------------------------------------------|----------------------------------------------------------------------------|
| 1579.9       | (GlcNAc)2(Man)5                                          |                 | 20                                                          | 9                                                                          |
| 1783.9       | (GlcNAc)2(Man)6                                          |                 | 6                                                           | 2                                                                          |
| 1988.1       | (GlcNAc)2(Man)7                                          |                 | 5                                                           | 2                                                                          |
| 1999.0       | (GlcNAc)3(Man)5 (Fuc)<br>OR<br>(GlcNAc)3(Man)4(Gal)(Fuc) |                 | 9                                                           | 6                                                                          |
| 2192.1       | (GlcNAc)2(Man)8                                          |                 | 3                                                           | 2                                                                          |
| 2203.1       | (GlcNAc)3(Man)5(Gal)(Fuc)                                |                 | 7                                                           | 4                                                                          |
| 2244.2       | (GlcNAc)4(Man)3(Gal)(Fuc)                                |                 | 4                                                           | 3                                                                          |
| 2377.2       | (GlcNAc)3(Man)5(Gal)(Fuc)2                               |                 | 5                                                           | 3                                                                          |
| 2418.2       | (GlcNAc)4(Man)3(Gal)2(Fuc)2                              |                 | 5                                                           | 4                                                                          |
| 2448.2       | (GlcNAc)4(Man)3(Gal)3(Fuc)2                              |                 | 2                                                           | 1                                                                          |
| 2564.3       | (GlcNAc)3(Man)5(Gal)(Fuc)(NeuAc)                         |                 | 30                                                          | 56                                                                         |
| 2605.3       | (GlcNAc)4(Man)3(Gal)2(Fuc)(NeuAc)                        |                 | 3                                                           | 6                                                                          |
| 2622.3       | (GlcNAc)4(Man)3(Gal)3(Fuc)2                              |                 | 0                                                           | 0                                                                          |
| 2652.3       | (GlcNAc)4(Man)3(Gal)4(Fuc)                               |                 | 0                                                           | 1                                                                          |
| 2809.4       | (GlcNAc)4(Man)3(Gal)3(Fuc)(NeuAc)                        |                 | 0                                                           | 0                                                                          |
| 3013.4       | (GlcNAc)4(Man)3(Gal)4(Fuc)(NeuAc)                        |                 | 0                                                           | 0                                                                          |
| 3374.6       | (GlcNAc)4(Man)3(Gal)4(Fuc)(NeuAc)2                       |                 | 0                                                           | 0                                                                          |
| Total        |                                                          |                 | 100                                                         | 100                                                                        |

f

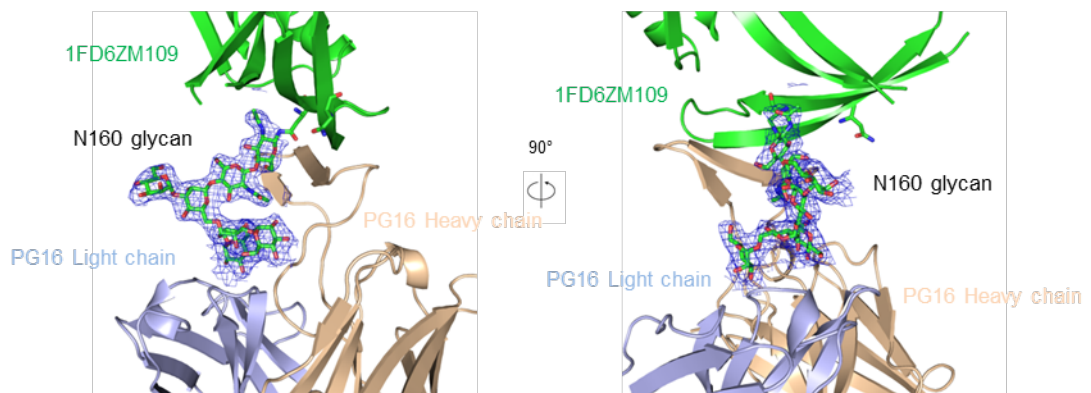

### Supplementary Figure 2 | Glycoforms present on the scaffolded V1/V2 1FD6 ZM109 A4.

**a**, ELISA binding of selected lectins including *Maackia amurensis* lectin II (MA), *Sambucus nigra* lectin (SN), concavalin A (ConA) and cyanovirin-N (CVN) to scaffolded V1/V2. **b**, ELISA showing binding of PG9 and PG16 to 1FD6 V1/V2 ZM109 A4 scaffold, either untreated or treated with various neuraminidases (3 hours at 37°C per manufacturer's instruction) that show different specificities for the linkage between galactose and sialic acid. PG16 does not bind to scaffolded V1/V2 pretreated with

neuraminidase or Sialidase A (faster rate for  $\alpha$ 2-6 linkage) but retains binding to scaffold treated with  $\alpha$ 2-3 neuraminidase. PG9 is less affected by neuraminidase treatment. 1FD6 ZM109 A4 scaffold was either untreated or treated with various neuraminidases per manufacturer's instructions for 3 hours at 37 °C.  $\alpha$ 2-3 Neuraminidase is a highly specific exoglycosidase that catalyzes the hydrolysis of  $\alpha$ 2-3 and, at a much lower rate,  $\alpha$ 2-6 linked N-acetyl-neuraminic acid residues from oligosaccharides. This enzyme has a 260-fold preference for  $\alpha$ 2-3 sialyl linkages over  $\alpha$ 2-6 sialyl linkages and shows only trace activity against  $\alpha$ 2-8 sialyl linkages. Sialidase A releases  $\alpha$ 2-3-,  $\alpha$ 2-6-,  $\alpha$ 2-8- and  $\alpha$ 2-9-linked N-acetylneuraminic acid from complex carbohydrates. The initial rate of hydrolysis of  $\alpha$ 2-6 linkages is reported to be approximately twice that of  $\alpha$ 2-3-linked sialic acid however, in practice, this kinetic selectivity is of little consequence during extended incubations (Uchida et al., 1979). **c**, MALDI MS analysis of *N*-glycans released from 1FD6ZM109A4 with detection covering *m/z* 899-5000. **d**, Overview of sample processing. **(e)** Proposed *N*-linked glycans assigned on the basis of molecular weight, and their percent abundance. Glycan analyses and glycopeptide mapping were performed at the Complex Carbohydrate Research Center. Experimental details are freely available at <http://www.ccruc.uga.edu/services/ccrcanalyticalservices/index.html>. **e**, Man<sub>5</sub>GlcNAc<sub>2</sub> electron density. Man<sub>5</sub>GlcNAc<sub>2</sub> and Asn160 are shown in green stick representation why oxygen atoms in red and nitrogen atoms in blue. Scaffolded-V1V2 is shown in green ribbon representation as well as PG16 antibody (heavy chain is tan and light chain is light blue).The 2Fo-Fc map obtained after final refinement is shown in blue at 1 $\sigma$ .

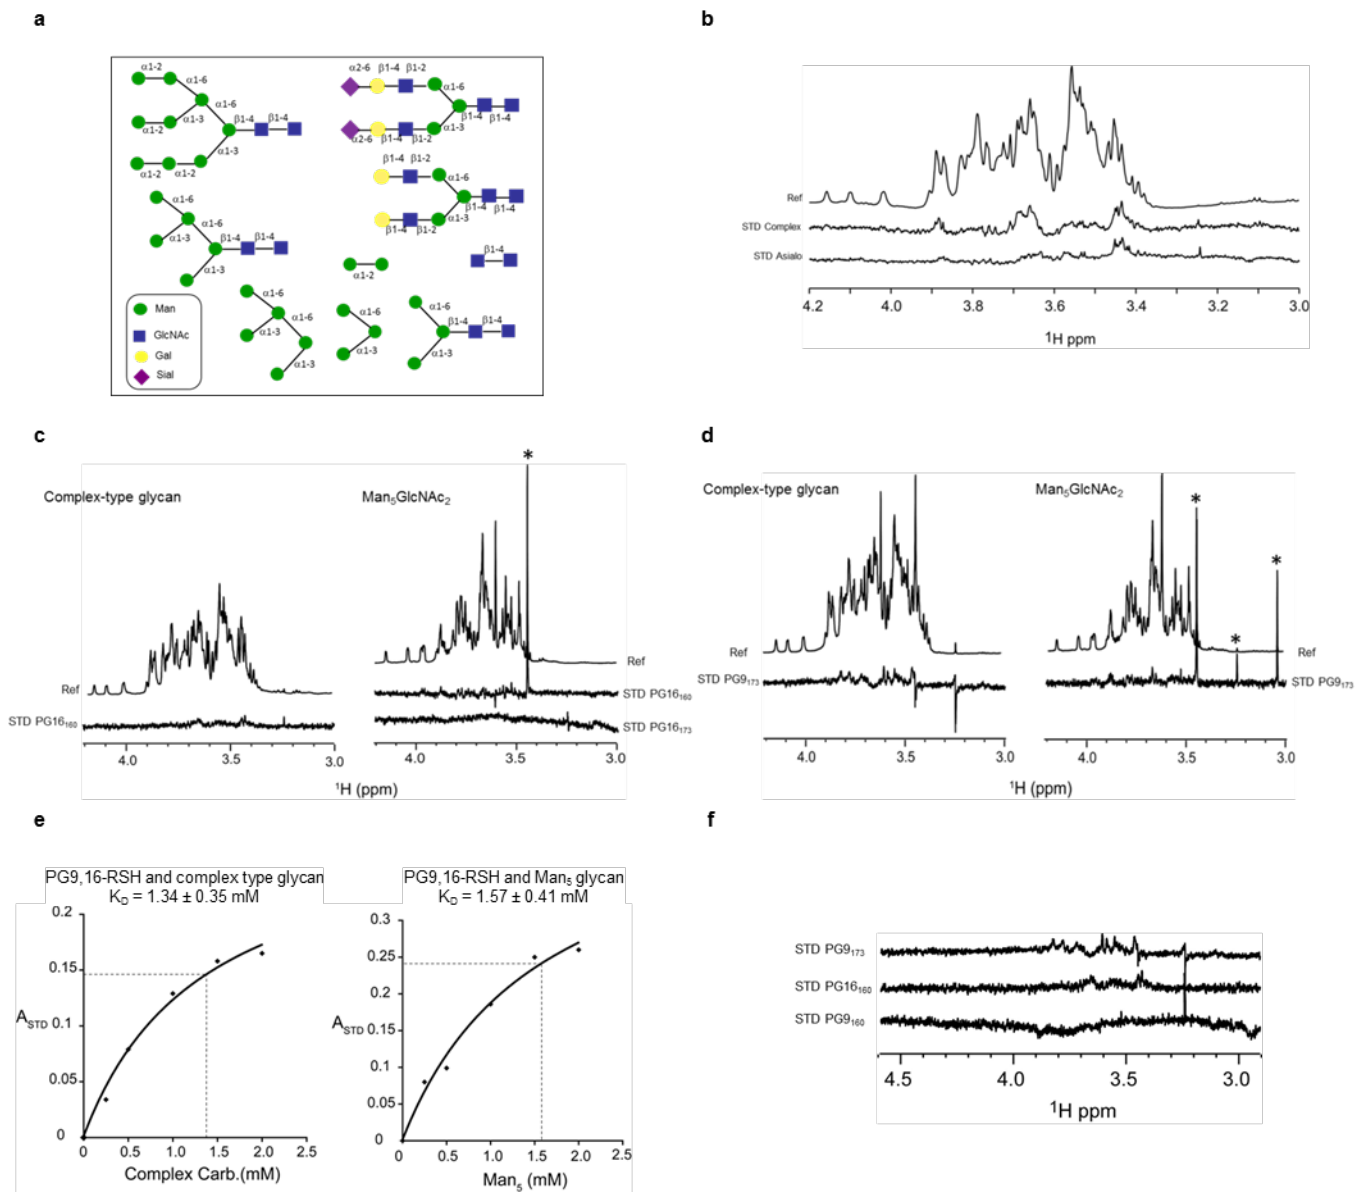

### Supplementary Figure 3 | NMR data.

**a**, Glycan fragments from gp120 used for screening. Glycan fragments shown are representative of those present on gp120. Each of these glycans was analyzed by STD NMR for binding to PG16 and PG9 antibodies. **b**, Complex-type glycan binds PG16 mainly through terminal sialic acids. STD NMR spectra of 2 mM complex-type glycan (middle) and 2 mM asialo complex-type glycan (bottom) in the presence of 20  $\mu$ M Fab PG16. **c**,  $\text{Man}_5\text{GlcNAc}_2$  binds negligibly to PG16<sub>160</sub> and does not bind to PG16<sub>173</sub>, complex-type glycan binds negligibly to PG16<sub>160</sub>. Left panel, STD (lower) and corresponding reference (upper) spectra of 2 mM complex-type glycan in the presence of 20  $\mu$ M PG16<sub>160</sub> shows negligible STD enhancements. Right panel, STD NMR spectra of 2 mM  $\text{Man}_5\text{GlcNAc}_2$  in the presence of 20  $\mu$ M PG16<sub>173</sub> (lowest) shows no binding and 20  $\mu$ M PG16<sub>160</sub> (middle) shows negligible binding. The corresponding reference spectrum is shown at the top. **d**, PG9<sub>173</sub> binds complex-type glycan very weakly and  $\text{Man}_5\text{GlcNAc}_2$  negligibly. STD and corresponding reference spectra of 2 mM complex-type glycan (left panel) and 2 mM  $\text{Man}_5\text{GlcNAc}_2$  in the presence of 20  $\mu$ M PG9<sub>173</sub> (right panel). The signal denoted by an asterisk (\*) corresponds to a buffer impurity. **e**, Binding curves used to calculate the  $K_{\text{D}}$ s

of chimeric antibody PG9,16-RSH to complex-type glycan and  $\text{Man}_5\text{GlcNAc}_2$ . Langmuir binding curves showing the effects on STD enhancement (expressed as the STD amplification factor  $A_{\text{STD}}$ ) as a function of glycan concentration at a saturation time of 0.2 s ( $t_{\text{sat}}=0.2$  s), and used to obtain the equilibrium dissociation constants ( $K_D$ ) from the initial slopes. **f**, Qualitatively defined very weak and negligible binding affinities. STD NMR spectra of 2 mM complex-type glycan in the presence of 20  $\mu\text{M}$  PG16 and PG9 mutants. Complex-type glycan binds to PG9<sub>173</sub> very weakly (upper) and to PG16<sub>160</sub> negligibly (middle). This glycan does not bind to PG9<sub>160</sub> (lower).



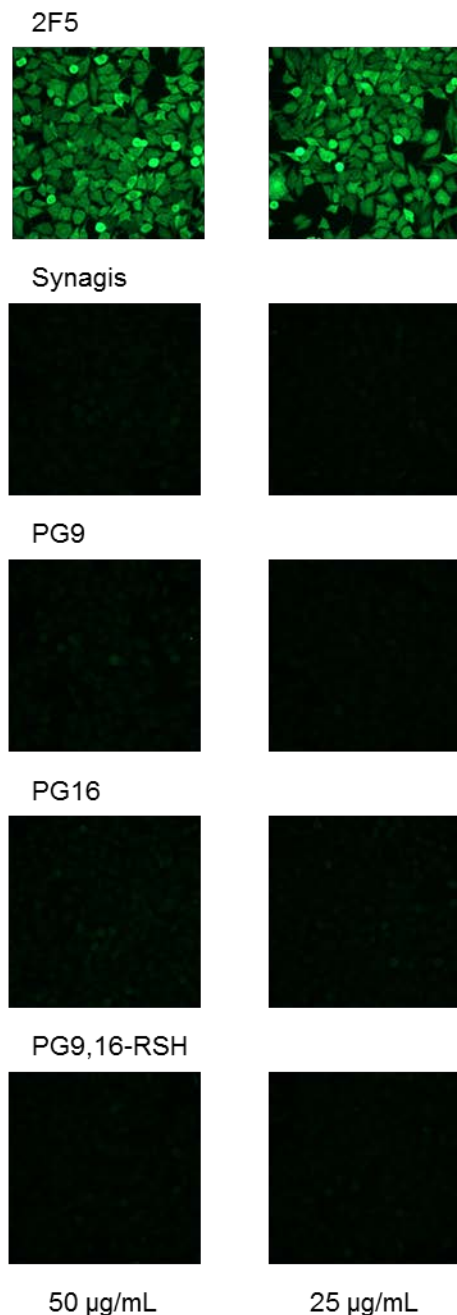

### Cardiolipin reactivity

| Antibody   | concentration (µg/ml) |       |       |       |       |       |       |       |
|------------|-----------------------|-------|-------|-------|-------|-------|-------|-------|
|            | 100                   | 33.33 | 11.11 | 3.70  | 1.23  | 0.41  | 0.14  | 0.05  |
| PG9        | 0.079                 | 0.049 | 0.044 | 0.039 | 0.042 | 0.039 | 0.041 | 0.041 |
| PG16       | 0.711                 | 0.296 | 0.079 | 0.046 | 0.042 | 0.039 | 0.041 | 0.034 |
| PG9,16-RSH | 0.511                 | 0.116 | 0.065 | 0.044 | 0.042 | 0.040 | 0.041 | 0.041 |
| Synagis    | 0.040                 | 0.039 | 0.039 | 0.039 | 0.040 | 0.038 | 0.041 | 0.042 |
| 4E10 IgG1  | 2.612                 | 2.587 | 2.478 | 2.198 | 1.761 | 0.999 | 0.456 | 0.187 |

### Athena antinuclear antigen reactivity

| Antibody      | ug/ml | Autoantigen |     |     |     |        |      |       |        |         |  |
|---------------|-------|-------------|-----|-----|-----|--------|------|-------|--------|---------|--|
|               |       | SSA         | SSB | Sm  | RNP | Scl 70 | Jo 1 | dsDNA | Cent B | Histone |  |
| PG9           | 50    | 3           | 2   | 5   | 5   | 3      | 3    | 25    | 5      | 6       |  |
|               | 25    | 3           | 2   | 2   | 3   | 2      | 2    | 12    | 2      | 3       |  |
|               | 12.5  | 1           | 3   | 4   | 3   | 3      | 4    | 10    | 1      | 4       |  |
|               | 6.25  | 2           | 2   | 3   | 2   | 3      | 2    | 8     | 1      | 3       |  |
| PG16          | 50    | 4           | 3   | 5   | 5   | 4      | 2    | 1     | 2      | 0       |  |
|               | 25    | 3           | 4   | 4   | 3   | 4      | 2    | 10    | 2      | 2       |  |
|               | 12.5  | 1           | 3   | 3   | 3   | 3      | 3    | 6     | 1      | 2       |  |
|               | 6.25  | 2           | 2   | 4   | 2   | 1      | 3    | 5     | 1      | 2       |  |
| PG9,16-RSH    | 50    | 4           | 2   | 9   | 2   | 10     | 9    | 30    | 3      | 2       |  |
|               | 25    | 3           | 2   | 5   | 3   | 5      | 5    | 26    | 2      | 1       |  |
|               | 12.5  | 3           | 2   | 2   | 1   | 3      | 4    | 17    | 2      | 4       |  |
|               | 6.25  | 2           | 2   | 4   | 2   | 3      | 2    | 19    | 2      | 2       |  |
| Synagis       | 50    | 3           | 3   | 4   | 3   | 2      | 2    | 7     | 1      | 3       |  |
|               | 25    | 3           | 2   | 4   | 2   | 2      | 3    | 1     | 1      | 2       |  |
| 4E10 IgG1     | 50    | 201         | 276 | 21  | 7   | 3      | 204  | 17    | 57     | 140     |  |
|               | 25    | 155         | 249 | 14  | 4   | 2      | 182  | 8     | 34     | 110     |  |
| Neg Control   | -     | -           | -   | -   | -   | -      | -    | -     | -      | -       |  |
| Pos Control 1 | -     | 650         | 435 | -   | -   | -      | -    | -     | 204    | -       |  |
| Pos Control 2 | -     | -           | -   | 701 | 420 | 421    | 539  | 1051  | -      | 752     |  |
| Pos Control 3 | -     | -           | -   | -   | -   | -      | -    | -     | -      | -       |  |
| Neg Control   | -     | -           | -   | -   | -   | -      | -    | -     | -      | -       |  |

### Supplementary Figure 4 | Autoreactivity assessment of PG9, PG16 and PG9,16-RSH.

Immunofluorescence of HEp-2 epithelial cells stained with antibody at 50 and 25 µg/ml. Cardiolipin reactivity: samples for which cardiolipin reactivity exceeded 0.2 are highlighted in yellow. Athena antinuclear antigen reactivity: samples for with autoantigen reactivity exceeded 125 are highlighted in yellow.

Donor IAVI 24

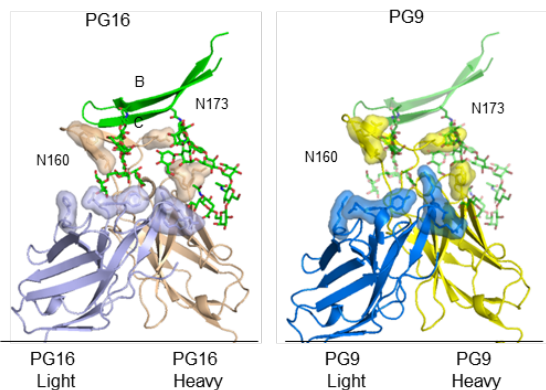

20.0% of somatic changes that result in different residues between PG16 and PG9 interact with glycans, 27.3% interact with both protein and glycans

| Germline         | PG16       | Glycans                        | PG9        | Glycans                             |
|------------------|------------|--------------------------------|------------|-------------------------------------|
| H SER 55         | H NET 55   | Not determined                 | H SER 55   | 156/173, NAG 657, MAN 658, 659      |
| H ASN 56         | H ARG 56   | 156/173, SIA 582               | H GLU 56   | Not determined                      |
| CDR H3 insertion | H ILE 100  | 160, NAG 561, MAN 565          | H ASP 100  | 160, NAG 560, 561, MAN 565          |
| CDR H3 insertion | H HIS 100B | 160, NAG 560, 561              | H ARG 100B | 160, NAG 560, 561                   |
| H TRP 100K       | H ASN 100K | 156/173, NAG 573               | H TYR 100K | 156/173, NAG 657, 160, MAN 660, 662 |
| L TYR 30         | L PHE 30   | 160, MAN 562, 564, 566         | L TYR 30   | 160, MAN 562, 564, 566              |
| L ASN 31         | L ASP 31   | 160, MAN 564, 565              | L GLU 31   | 160, MAN 564, 565                   |
| L ASN 53         | L HIS 53   | Not determined                 | L LYS 53   | 160, MAN 565                        |
| L SER 94         | L ARG 94   | 156/173, GAL 581, SIA 582      | TL HR 94   | Not determined                      |
| L SER 95         | L SER 95   | 160, MAN 566, 156/173, MAN 578 | L ARG 95   | 160, MAN 566                        |
| L THR 95A        | L HIS 95A  | 156/173, SIA 582               | L ARG 95A  | Not determined                      |

Donor IAVI 17

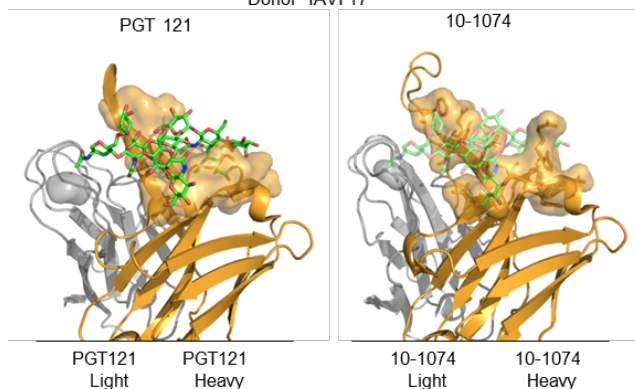

22.3% of somatic changes that result in different residues between PGT121 and 10-1074 interact with glycans

| Germline   | PGT121     | Glycans                       | 10-1074    | Glycans        |
|------------|------------|-------------------------------|------------|----------------|
| H SER 31   | H ASP 31   | SIA 310, GAL 308              | H ASN 31   | Not determined |
| H TYR 32   | H SER 32   | SIA 310                       | H TYR 32   | Not determined |
| H TYR 52   | H HIS 52   | NAG 307, GAL 308              | H SER 52   | Not determined |
| H TYR 53   | H LYS 53   | GAL 308                       | H ASP 53   | Not determined |
| H SER 54   | H SER 54   | NAG 307, GAL 308              | H ARG 54   | Not determined |
| H GLU 55   | H GLY 55   | NAG 304, BMA 301, MAN 303     | H GLU 55   | Not determined |
| H SER 56   | H ASP 56   | NAG 307, MAN 302, BMA 301     | H SER 56   | Not determined |
| H THR 57   | H THR 57   | NAG 304, MAN 303              | H ALA 57   | Not determined |
| H ASN 58   | H ASN 58   | NAG 304, 306 BMA 301, MAN 303 | H THR 58   | Not determined |
| H GLN 97   | H HIS 97   | NAG 307, GAL 308              | H ARG 97   | Not determined |
| H LYS 99   | H ARG 99   | NAG 307, MAN 302              | H GLN 99   | Not determined |
| H TYR 100J | H TRP 100J | MAN 302                       | H PHE 100J | Not determined |
| H TYR 100L | H THR 100L | NAG 307, MAN 302              | H TYR 100L | Not determined |
| H TYR 100O | H TYR 100O | SIA 310                       | H SER 100O | Not determined |
| L ASP 95A  | L PRO 95A  | NAG 305                       | L GLY 95A  | Not determined |

Donor IAVI 36

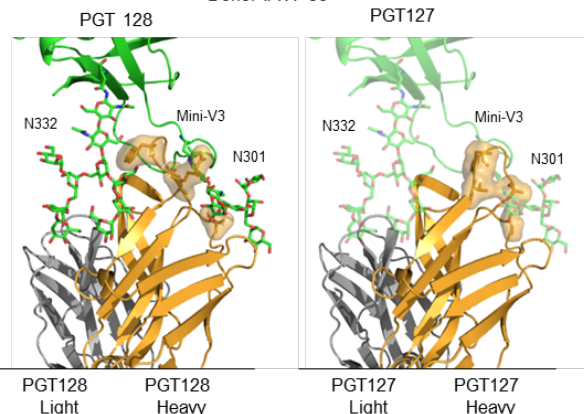

19.0% of somatic changes that result in different residues between PGT128 and PGT127 interact with glycans, 33.3% interact with both protein and glycans

| Germline          | PGT128    | Glycans                    | PGT127    | Glycans        |
|-------------------|-----------|----------------------------|-----------|----------------|
| H SER 30          | H ALA 30  | NAG 2 (cpx)                | H GLY 30  | Not determined |
| H GLY 52C         | H ALA 52C | NAG 1 (cpx)                | H ARG 52C | Not determined |
| CDR H2 insertion  | H TRP 52F | MAN 4 (man9), NAG 2 (cpx)  | H TYR 52F | Not determined |
| HCDR H2 insertion | H ARG 54  | MAN D3 (man9), MAN 4 (cpx) | H THR 54  | Not determined |

### Supplementary Figure 5 | Glycan interactions with various somatic variants.

Somatic variants for donor IAVI 24 (PG16, PG9), IAVI 17 (or patient 10) (PGT121, 10-1074), IAVI 36 (PGT128, PGT127) are shown in cartoon representation (with heavy and light chain in different colors) bound to glycans (green sticks, transparent when modeled). Residues that are affinity matured and differed between somatic variants are shown as sticks and semitransparent surface representation and are listed. The percentages of somatic changes that interact with glycans only or with both proteins and glycans are indicated.

**Supplementary Table 1. Comparison of glycan specificities of anti-gp120 glycan directed antibodies**

| <b>Anti-gp120 antibody</b> | <b>glycan specificity</b>                                        | <b>References</b>                                           |
|----------------------------|------------------------------------------------------------------|-------------------------------------------------------------|
| 2G12                       | Man $\alpha$ 1-2Man (of Man <sub>8-9</sub> GlcNAc <sub>2</sub> ) | Calarese et al., 2003, Science                              |
| PGT125-130                 | Man <sub>8-9</sub> GlcNAc <sub>2</sub>                           | Walker et al., 2011, Nature                                 |
| PGT121                     | Complex-type glycan                                              | Walker et al., 2011, Nature; Mouquet et al., PNAS, 2012     |
| PGT141-144                 | Man <sub>5</sub> GlcNAc <sub>2</sub>                             | Walker et al., 2011, Nature                                 |
| PGT145                     | Man <sub>9</sub> GlcNAc <sub>2</sub>                             | Walker et al., 2011, Nature                                 |
| PG9                        | Man <sub>5</sub> GlcNAc <sub>2</sub> (N160 site)                 | Walker et al., 2009, Science; McLellan et al., 2011, Nature |
| CH01-CH05                  | Man <sub>5</sub> GlcNAc <sub>2</sub>                             | Bonsignori et al., 2011, J. Virol.                          |

**Supplementary Table 2. ZM109: PG16 interactions**

A. ZM109-Protein : PG16-Protein interactions

|              | <b>Interface Residue</b> | <b>Bond Type</b> | <b>ASA</b> | <b>BSA</b> | <b><math>\Delta_iG</math></b> |
|--------------|--------------------------|------------------|------------|------------|-------------------------------|
| <b>ZM109</b> | ZM109:SER 158            |                  | 32.30      | 1.00       | 0.02                          |
|              | ZM109:ASN 160            |                  | 75.57      | 22.91      | -0.07                         |
|              | ZM109:THR 163            |                  | 38.97      | 3.99       | -0.03                         |
|              | ZM109:LYS 166            |                  | 156.02     | 4.06       | -0.05                         |
|              | ZM109:ASP 167            | H                | 112.64     | 62.08      | 0.04                          |
|              | ZM109:ARG 168            | HS               | 150.62     | 101.40     | -1.21                         |
|              | ZM109:LYS 169            | H                | 110.83     | 75.27      | 0.32                          |
|              | ZM109:GLN 170            |                  | 93.97      | 66.16      | 0.04                          |
|              | ZM109:LYS 171            | H                | 147.63     | 89.15      | 0.22                          |
|              | ZM109:VAL 172            |                  | 40.63      | 4.66       | 0.07                          |
|              | ZM109:ASN 173            |                  | 126.70     | 22.32      | -0.13                         |
| <b>PG16</b>  | H:TRP 100A               |                  | 141.19     | 0.31       | 0.00                          |
|              | H:ASP 100C               |                  | 133.63     | 10.68      | -0.12                         |
|              | H:ASP 100D               |                  | 132.70     | 15.19      | -0.16                         |
|              | H:VAL 100E               |                  | 69.35      | 54.79      | 0.88                          |
|              | H:LYS 100F               | H                | 84.96      | 49.90      | 0.07                          |
|              | H:TYR 100G               |                  | 101.40     | 59.23      | 0.72                          |
|              | H:TYR 100H               | H                | 115.35     | 69.49      | -0.23                         |
|              | H:ASP 100I               |                  | 53.65      | 15.65      | -0.08                         |
|              | H:PHE 100J               |                  | 178.64     | 94.07      | 1.45                          |
|              | H:ASN 100K               |                  | 151.68     | 16.90      | 0.03                          |
|              | H:ASP 100L               | HS               | 108.53     | 59.62      | -0.46                         |
| H:TYR 100O   |                          | 80.51            | 18.82      | -0.14      |                               |

**Bond type:** H: Hydrogen, S: Salt bridge

**ASA** Accessible Surface Area, Å<sup>2</sup>

**BSA** BuriedSurfaceArea, Å<sup>2</sup>

**$\Delta_iG$**  Solvation energy effect, kcal/mol

|||| Buried area percentage, one bar per 10%

Detailed interface data was calculated on the EBI PISA server ([http://www.ebi.ac.uk/msd-srv/prot\\_int/cgi-bin/piserver](http://www.ebi.ac.uk/msd-srv/prot_int/cgi-bin/piserver))

B. ZM109-Glycan160: PG16-Protein interactions

| Interface Residue           | Bond Type | ASA    | BSA    | $\Delta_i G$ |
|-----------------------------|-----------|--------|--------|--------------|
| <b>ZM109:NAG 560-PG16:H</b> | H         | 361.50 | 98.97  | -1.75        |
| H:ILE 100                   |           | 60.92  | 4.36   | 0.07         |
| H:HIS 100B                  | H         | 102.12 | 15.83  | -0.34        |
| H:TYR 100G                  |           | 101.40 | 25.36  | 0.41         |
| H:TYR 100O                  |           | 80.51  | 18.20  | -0.05        |
| <b>ZM109:NAG 561-PG16:H</b> |           | 360.36 | 75.68  | -2.26        |
| H:ILE 100                   |           | 60.92  | 16.40  | 0.26         |
| H:HIS 100B                  |           | 102.12 | 8.46   | -0.31        |
| H:TYR 100O                  |           | 80.51  | 21.05  | 0.29         |
| <b>ZM109:MAN 562-PG16:L</b> |           | 292.34 | 10.70  | -0.35        |
| L:PHE 30                    |           | 67.36  | 9.68   | 0.15         |
| <b>ZM109:MAN 564-PG16:H</b> |           | 287.55 | 38.89  | -0.26        |
| H:ILE 100                   |           | 60.92  | 9.37   | 0.15         |
| H:TYR 100O                  |           | 80.51  | 1.64   | 0.03         |
| H:ASN 100P                  |           | 71.09  | 0.37   | -0.00        |
| H: HIS 100R                 |           | 155.46 | 29.58  | 0.77         |
| <b>ZM109:MAN 564-PG16:L</b> |           | 287.55 | 47.13  | -0.61        |
| L:PHE 30                    |           | 67.36  | 21.88  | 0.35         |
| L:ASP 31                    |           | 100.74 | 7.10   | 0.06         |
| L:SER 32                    |           | 38.08  | 5.50   | -0.06        |
| L:LEU 91                    |           | 45.80  | 9.11   | 0.15         |
| <b>ZM109:MAN 565-PG16:H</b> | H         | 289.33 | 98.24  | -0.57        |
| H:ILE 100                   |           | 60.92  | 29.97  | 0.48         |
| H:HIS 100B                  |           | 102.12 | 0.31   | 0.01         |
| H:ASN 100P                  |           | 71.09  | 2.92   | -0.03        |
| H:TYR 100Q                  |           | 77.59  | 15.43  | 0.04         |
| H:HIS 100R                  | H         | 155.46 | 22.27  | 0.01         |
| <b>ZM109:MAN 565-PG16:L</b> | H         | 289.33 | 95.63  | -1.91        |
| L:ASP 31                    |           | 100.74 | 21.19  | 0.11         |
| L:SER 32                    | H         | 38.08  | 12.37  | -0.09        |
| L:ASP 50                    |           | 59.28  | 31.59  | -0.16        |
| <b>ZM109:MAN 566-PG16:H</b> | H         | 291.89 | 111.31 | -1.22        |
| H:ASP 100I                  |           | 53.65  | 0.25   | -0.00        |
| H:TYR 100O                  |           | 80.51  | 20.81  | 0.33         |
| H:ASN 100P                  | H         | 71.09  | 22.59  | -0.23        |
| H:HIS 100R                  | H         | 155.46 | 27.12  | 0.54         |
| <b>ZM109:MAN 566-PG16:L</b> |           | 291.89 | 66.07  | -1.11        |
| L:PHE 30                    |           | 67.36  | 9.99   | 0.16         |
| L:LEU 91                    |           | 45.80  | 17.64  | 0.28         |
| L:THR 92                    |           | 19.83  | 0.73   | -0.01        |
| L:SER 95                    |           | 90.99  | 16.90  | -0.17        |
| L:ARG 96                    |           | 174.64 | 4.07   | -0.15        |

**Bond type:** H: Hydrogen, S: Salt bridge

**ASA** Accessible Surface Area, Å<sup>2</sup>

**BSA** BuriedSurfaceArea, Å<sup>2</sup>

**$\Delta_i G$**  Solvation energy effect, kcal/mol

||| Buried area percentage, one bar per 10%

Detailed interface data was calculated on the EBI PISA server ([http://www.ebi.ac.uk/msd-srv/prot\\_int/cgi-bin/piserver](http://www.ebi.ac.uk/msd-srv/prot_int/cgi-bin/piserver))

C. ZM109-Glycan173: PG16-Protein interactions

| Interface Residue           | Bond Type | ASA    | BSA    | $\Delta_i G$ |
|-----------------------------|-----------|--------|--------|--------------|
| <b>ZM109:NAG 573-PG16:H</b> |           | 359.11 | 68.75  | -2.03        |
| H:PHE 100J                  |           | 178.64 | 54.27  | 0.87         |
| H:ASN 100K                  |           | 151.68 | 7.61   | -0.13        |
| <b>ZM109:MAN 578-PG16:L</b> |           | 289.45 | 12.91  | -0.38        |
| L:ASP 93                    |           | 89.43  | 2.95   | -0.03        |
| L:SER 95                    |           | 90.99  | 10.80  | -0.12        |
| <b>ZM109:GAL 581-PG16:H</b> |           | 291.06 | 87.28  | -1.90        |
| H:HIS 59                    |           | 47.52  | 7.04   | -0.09        |
| H:ASP 61                    |           | 141.69 | 14.30  | -0.16        |
| H:TRP 64                    |           | 191.71 | 59.08  | 0.61         |
| <b>ZM109:GAL 581-PG16:L</b> | H         | 291.06 | 18.46  | 0.43         |
| L:ARG 94                    | H         | 168.75 | 17.83  | -0.40        |
| <b>ZM109:SIA 582-PG16:H</b> | H         | 436.88 | 175.71 | -0.61        |
| H:ARG 56                    |           | 119.07 | 13.22  | 0.21         |
| H:LYS 57                    | H         | 89.39  | 29.45  | -0.18        |
| H:TYR 58                    |           | 112.70 | 45.73  | 0.61         |
| H:HIS 59                    |           | 47.52  | 26.93  | -0.49        |
| H:TRP 64                    |           | 191.71 | 19.44  | 0.04         |
| <b>ZM109:SIA 582-PG16:L</b> | H         | 436.88 | 76.46  | -1.12        |
| L:ARG 94                    | H         | 168.75 | 28.25  | -0.35        |
| L:HIS 95A                   | H         | 86.96  | 22.74  | 0.31         |

**Bond type:** H: Hydrogen, S: Salt bridge

**ASA** Accessible Surface Area, Å<sup>2</sup>

**BSA** BuriedSurfaceArea, Å<sup>2</sup>

**$\Delta_i G$**  Solvation energy effect, kcal/mol

|||| Buried area percentage, one bar per 10%

Detailed interface data was calculated on the EBI PISA server ([http://www.ebi.ac.uk/msd-srv/prot\\_int/cgi-bin/piserver](http://www.ebi.ac.uk/msd-srv/prot_int/cgi-bin/piserver))

## D. Hydrogen bonds interactions between glycans and PG16 or PG9

| Glycan residue | PG16 residue               | distance    | PG9 residue                | distance    |
|----------------|----------------------------|-------------|----------------------------|-------------|
| Nag 560 O5     | His 100B <sub>HC</sub> NE2 | <b>3.07</b> | Arg 100B <sub>HC</sub> NH2 | <b>3.29</b> |
| Nag 560 O6     |                            |             | Arg 100B <sub>HC</sub> NH2 | <b>2.98</b> |
|                |                            |             | Asp 100 <sub>HC</sub> OD2  | <b>2.62</b> |
|                |                            |             | Arg 100B <sub>HC</sub> NE  | <b>3.08</b> |
| Man 565 O2     | Asp 31 <sub>LC</sub> O     | <b>2.67</b> | Glu 31 <sub>LC</sub> O     | <b>2.72</b> |
|                | Asp 50 <sub>LC</sub> OD1   | <b>3.38</b> | Asp 50 <sub>LC</sub> OD1   | <b>3.36</b> |
|                | Asp 50 <sub>LC</sub> OD2   | 3.89        | Asp 50 <sub>LC</sub> OD2   | 3.54        |
| Man 565 O3     | Asp 31 <sub>LC</sub> O     | 3.63        | Glu 31 <sub>LC</sub> O     | 3.6         |
|                | Asp 50 <sub>LC</sub> OD1   | <b>2.57</b> | Asp 50 <sub>LC</sub> OD1   | <b>2.7</b>  |
|                | Ser 32 <sub>LC</sub> OG    | <b>2.95</b> | Ser 32 <sub>LC</sub> OG    | <b>2.74</b> |
|                | His 100R <sub>HC</sub> ND1 | <b>3.02</b> | His 100R <sub>HC</sub> ND1 | <b>2.89</b> |
|                | Tyr 100Q <sub>HC</sub> O   | 3.79        | Tyr 100Q <sub>HC</sub> O   | 3.81        |
| Man 565 O4     | His 100R <sub>HC</sub> ND1 | 3.68        | His 100R <sub>HC</sub> ND1 | 3.69        |
| Man 566 O3     | Asn 100P <sub>HC</sub> N   | <b>3.11</b> | Asn 100P <sub>HC</sub> N   | <b>2.9</b>  |
|                | Asn 100P <sub>HC</sub> ND2 | 3.72        | Asn 100P <sub>HC</sub> ND2 | <b>3.37</b> |
| Man 566 O4     | His 100R <sub>HC</sub> NE2 | <b>2.79</b> | His 100R <sub>HC</sub> NE2 | <b>2.79</b> |
|                | Asn 100P <sub>HC</sub> ND2 | <b>3.39</b> | Asn 100P <sub>HC</sub> ND2 | <b>3.12</b> |

| Glycan residue | PG16 residue             | distance    | PG9 residue               | distance    |
|----------------|--------------------------|-------------|---------------------------|-------------|
| Nag 573 N2     |                          |             | Tyr 100K <sub>HC</sub> OH | 3.81        |
| Nag 573 O7     |                          |             | Tyr 100K <sub>HC</sub> OH | <b>2.94</b> |
| Gal 581 O4     | Arg 94 <sub>LC</sub> NH2 | 3.86        |                           |             |
| Gal 581 O6     | Trp 64 <sub>HC</sub> NE1 | 3.84        |                           |             |
| Sia 582 N5     | Lys 57 <sub>HC</sub> O   | <b>3.08</b> |                           |             |
| Sia 582 O1     | His 59 <sub>HC</sub> N   | <b>3.13</b> |                           |             |
|                | His 59 <sub>HC</sub> ND1 | 3.94        |                           |             |
|                | His 59 <sub>HC</sub> O   | 3.61        |                           |             |
| Sia 582 O3     | His 59 <sub>HC</sub> ND1 | <b>2.75</b> |                           |             |
| Sia 582 O8     | His 95 <sub>LC</sub> NE2 | <b>3.03</b> |                           |             |
| Sia 582 O9     | Arg 94 <sub>LC</sub> O   | <b>2.68</b> |                           |             |
|                | Arg 94 <sub>LC</sub> NE  | 3.87        |                           |             |
|                | His 95 <sub>LC</sub> NE2 | <b>3.39</b> |                           |             |

**Supplementary Table 3. Neutralization activity of PG9, PG16 and PG9,16-RSH on a large panel of pseudoviruses (195).**

A. IC<sub>50</sub> and IC<sub>80</sub> neutralization for PG9,16-RSH, PG9 and PG16

| Virus ID        | Clade | IC <sub>50</sub> |       |        | IC <sub>80</sub> |        |        |
|-----------------|-------|------------------|-------|--------|------------------|--------|--------|
|                 |       | PG9,16-RSH       | PG9   | PG16   | PG9,16-RSH       | PG9    | PG16   |
| 0260.v5.c36     | A     | 0.702            | 1.120 | 2.090  | 6.060            | 8.410  | >50    |
| 0330.v4.c3      | A     | 0.003            | 0.013 | 0.002  | 0.016            | 0.038  | 0.014  |
| 0439.v5.c1      | A     | >50              | >50   | >50    | >50              | >50    | >50    |
| 3365.v2.c20     | A     | 0.011            | 0.060 | 0.005  | 0.111            | 0.233  | 0.064  |
| 3415.v1.c1      | A     | 0.038            | 0.096 | 0.021  | 0.190            | 0.540  | 0.157  |
| 3718.v3.c11     | A     | 0.009            | 0.038 | 0.012  | 0.038            | 0.136  | 0.079  |
| 398-F1_F6_20    | A     | >50              | >50   | >50    | >50              | >50    | >50    |
| BB201.B42       | A     | 0.002            | 0.007 | 0.001  | 0.006            | 0.026  | 0.005  |
| BB539.2B13      | A     | 0.007            | 0.054 | 0.007  | 0.038            | 0.163  | 0.025  |
| BI369.9A        | A     | 0.003            | 0.017 | 0.004  | 0.020            | 0.067  | 0.022  |
| BS208.B1        | A     | 0.001            | 0.008 | 0.001  | 0.006            | 0.027  | 0.005  |
| KER2008.12      | A     | 0.002            | 0.007 | 0.002  | 0.010            | 0.028  | 0.016  |
| KER2018.11      | A     | 0.002            | 0.008 | 0.001  | 0.009            | 0.029  | 0.004  |
| KNH1209.18      | A     | 0.106            | 0.180 | 0.421  | >50              | >50    | >50    |
| MB201.A1        | A     | 0.033            | 0.103 | 0.021  | 0.130            | 0.305  | 0.224  |
| MB539.2B7       | A     | 0.011            | 0.060 | 0.010  | 0.073            | 0.256  | 0.150  |
| MI369.A5        | A     | 0.020            | 0.050 | 0.008  | 0.135            | 0.226  | 0.300  |
| MS208.A1        | A     | 0.031            | 0.079 | 0.030  | 0.279            | 0.609  | >50    |
| Q23.17          | A     | 0.001            | 0.003 | 0.000  | 0.004            | 0.012  | 0.002  |
| Q259.17         | A     | 0.023            | 0.050 | 0.031  | 0.186            | 0.340  | 28.500 |
| Q769.d22        | A     | 0.005            | 0.011 | 0.123  | 0.032            | 0.038  | 5.040  |
| Q842.d12        | A     | 0.009            | 0.024 | 0.003  | 0.029            | 0.068  | 0.022  |
| QH209.14M.A2    | A     | >50              | >50   | >50    | >50              | >50    | >50    |
| RW020.2         | A     | 0.081            | 0.124 | 0.253  | 1.090            | 0.771  | 27.900 |
| UG037.8         | A     | 0.007            | 0.014 | 0.002  | 0.037            | 0.080  | 0.015  |
| 3301.V1.C24     | AC    | 0.091            | 0.230 | 0.011  | 0.610            | 1.400  | 0.134  |
| 3589.V1.C4      | AC    | 0.006            | 0.027 | 0.522  | 0.034            | 0.098  | >50    |
| 6540.v4.c1      | AC    | 0.006            | 0.030 | 0.005  | 0.041            | 0.105  | 0.080  |
| 6545.V4.C1      | AC    | 0.006            | 0.036 | 0.016  | 0.043            | 0.144  | 0.315  |
| 0815.V3.C3      | ACD   | >50              | >50   | >50    | >50              | >50    | >50    |
| 6095.V1.C10     | ACD   | 0.126            | 0.151 | 0.011  | 1.630            | 1.130  | 0.157  |
| 3468.V1.C12     | AD    | 0.888            | 1.620 | 0.885  | >50              | >50    | >50    |
| Q168.a2         | AD    | 0.021            | 0.060 | 0.008  | 0.079            | 0.179  | 0.043  |
| Q461.e2         | AD    | 0.898            | 2.050 | 5.120  | 5.860            | 15.600 | >50    |
| 620345.c1       | AE    | 1.690            | 1.010 | >50    | >50              | >50    | >50    |
| BJOX009000.02.4 | AE    | 0.976            | 1.940 | 4.880  | 3.980            | 7.730  | >50    |
| BJOX010000.06.2 | AE    | 0.110            | 0.303 | 13.400 | 0.759            | 1.550  | >50    |
| BJOX015000.11.5 | AE    |                  |       |        |                  |        |        |
| BJOX025000.01.1 | AE    | 0.204            | 0.096 | 0.431  | 1.960            | 0.826  | >50    |
| BJOX028000.10.3 | AE    | 1.560            | 0.690 | 14.900 | 11.000           | 3.680  | >50    |
| C1080.c3        | AE    | 0.001            | 0.002 | 0.000  | 0.002            | 0.008  | 0.002  |
| C2101.c1        | AE    | 0.007            | 0.031 | 0.006  | 0.052            | 0.139  | 0.300  |
| C3347.c11       | AE    | 0.006            | 0.030 | 0.005  | 0.034            | 0.103  | 0.028  |
| C4118.09        | AE    | 0.011            | 0.038 | 0.019  | 0.045            | 0.093  | 0.196  |
| CM244.ec1       | AE    | 0.001            | 0.004 | 0.001  | 0.003            | 0.014  | 0.003  |
| CNE3            | AE    | 0.035            | 0.064 | 0.059  | 0.501            | 0.598  | >50    |
| CNE5            | AE    | 0.003            | 0.008 | 0.003  | 0.010            | 0.027  | 0.028  |



| Virus ID  | Clade | IC <sub>50</sub> |       |        | IC <sub>80</sub> |        |        |
|-----------|-------|------------------|-------|--------|------------------|--------|--------|
|           |       | PG9,16-RSH       | PG9   | PG16   | PG9,16-RSH       | PG9    | PG16   |
| CNE55     | AE    | 0.104            | 0.197 | 0.588  | 1.140            | 2.080  | >50    |
| CNE56     | AE    | >50              | >50   | >50    | >50              | >50    | >50    |
| CNE59     | AE    | 0.068            | 0.060 | 0.028  | 0.764            | 0.443  | 4.460  |
| CNE8      | AE    | 1.240            | 0.980 | 0.675  | 9.000            | 4.850  | >50    |
| M02138    | AE    | 0.065            | 0.210 | 0.050  | 0.468            | 0.954  | 1.000  |
| R1166.c1  | AE    | 0.568            | 1.100 | 0.414  | 2.260            | 3.900  | 7.640  |
| R2184.c4  | AE    | 0.247            | 0.384 | 3.680  | 1.570            | 2.230  | >50    |
| R3265.c6  | AE    | 0.025            | 0.084 | 0.010  | 0.137            | 0.322  | 0.091  |
| TH023.6   | AE    | 0.064            | 0.138 | 4.160  | 2.960            | 7.890  | >50    |
| TH966.8   | AE    | 0.006            | 0.015 | 0.002  | 0.028            | 0.061  | 0.010  |
| TH976.17  | AE    | >50              | >50   | >50    | >50              | >50    | >50    |
| 235-47    | AG    | 0.047            | 0.124 | 0.064  | 0.563            | 0.803  | 4.650  |
| 242-14    | AG    | 0.017            | 0.048 | 0.015  | 0.071            | 0.151  | 0.924  |
| 263-8     | AG    | 0.135            | 0.211 | 0.551  | 0.779            | 1.270  | 12.200 |
| 269-12    | AG    | 0.551            | 1.420 | 0.172  | 1.930            | 5.170  | 1.100  |
| 271-11    | AG    | 0.010            | 0.059 | 0.101  | 0.300            | 0.948  | >50    |
| 928-28    | AG    | 0.004            | 0.038 | 0.016  | 0.030            | 0.225  | 0.115  |
| DJ263.8   | AG    | 0.045            | 0.091 | 0.042  | 0.344            | 0.551  | 8.990  |
| T250-4    | AG    | 0.000            | 0.001 | 0.000  | 0.001            | 0.004  | 0.002  |
| T251-18   | AG    | >50              | >50   | 5.620  | >50              | >50    | >50    |
| T253-11   | AG    | 0.056            | 0.142 | 2.860  | 0.570            | 0.819  | >50    |
| T255-34   | AG    | 0.011            | 0.020 | 0.006  | 0.095            | 0.126  | 0.073  |
| T257-31   | AG    | 0.006            | 0.019 | 0.002  | 0.025            | 0.059  | 0.011  |
| T266-60   | AG    | 0.129            | 0.321 | 0.482  | 0.908            | 1.420  | 13.800 |
| T278-50   | AG    | 0.329            | 0.385 | 0.381  | 2.170            | 2.510  | 21.000 |
| T280-5    | AG    | 0.119            | 0.339 | 0.273  | 0.504            | 1.060  | 4.870  |
| T33-7     | AG    | 0.004            | 0.019 | 0.016  | 0.034            | 0.162  | 0.471  |
| 3988.25   | B     | 0.012            | 0.045 | 0.022  | 0.078            | 0.200  | 0.841  |
| 5768.04   | B     | 0.114            | 0.270 | 0.285  | 2.940            | 2.540  | >50    |
| 6101.10   | B     | >50              | >50   | >50    | >50              | >50    | >50    |
| 6535.3    | B     | 0.125            | 0.166 | 4.180  | 0.917            | 1.220  | >50    |
| 7165.18   | B     | >50              | >50   | 12.200 | >50              | >50    | >50    |
| 45_01dG5  | B     | 0.030            | 0.128 | 0.015  | 0.187            | 0.414  | 0.069  |
| 89.6.DG   | B     | >50              | >50   | >50    | >50              | >50    | >50    |
| AC10.29   | B     | 0.007            | 0.031 | 0.005  | 0.051            | 0.191  | 0.060  |
| ADA.DG    | B     | 0.097            | 0.216 | 0.010  | 7.320            | >50    | >50    |
| Bal.01    | B     | 0.334            | 0.569 | >50    | 8.590            | >50    | >50    |
| Bal.26    | B     | 0.009            | 0.030 | 0.405  | 0.186            | 0.356  | >50    |
| BG1168.01 | B     | >50              | >50   | >50    | >50              | >50    | >50    |
| BL01.DG   | B     | >50              | >50   | >50    | >50              | >50    | >50    |
| BR07.DG   | B     | >50              | >50   | >50    | >50              | >50    | >50    |
| BX08.16   | B     | 0.004            | 0.017 | 0.010  | 0.038            | 0.101  | 25.000 |
| CAAN.A2   | B     | 2.850            | 6.310 | 11.000 | >50              | >50    | >50    |
| CNE10     | B     | 0.095            | 0.222 | >50    | 0.575            | 1.680  | >50    |
| CNE12     | B     | >50              | >50   | >50    | >50              | >50    | >50    |
| CNE14     | B     | >50              | >50   | >50    | >50              | >50    | >50    |
| CNE4      | B     | >50              | >50   | >50    | >50              | >50    | >50    |
| CNE57     | B     | >50              | >50   | >50    | >50              | >50    | >50    |
| HO86.8    | B     | 0.006            | 0.051 | 0.005  | 0.137            | 0.345  | 0.051  |
| HT593.1   | B     | 0.213            | 0.345 | 0.150  | 3.680            | 4.050  | 11.900 |
| HXB2.DG   | B     | 0.207            | 1.000 | >50    | 4.110            | 40.000 | >50    |
| JRCSF.JB  | B     | 0.001            | 0.004 | 0.003  | 0.005            | 0.016  | 0.076  |

| Virus ID     | Clade | IC <sub>50</sub> |        |        | IC <sub>80</sub> |        |        |
|--------------|-------|------------------|--------|--------|------------------|--------|--------|
|              |       | PG9,16-RSH       | PG9    | PG16   | PG9,16-RSH       | PG9    | PG16   |
| JRFL.JB      | B     | >50              | >50    | >50    | >50              | >50    | >50    |
| MN.3         | B     | 3.570            | 17.100 | >50    | >50              | >50    | >50    |
| PVO.04       | B     | 3.530            | 7.630  | 10.100 | 13.700           | 20.700 | >50    |
| QH0515.01    | B     | >50              | >50    | >50    | >50              | >50    | >50    |
| QH0692.42    | B     | >50              | >50    | >50    | >50              | >50    | >50    |
| REJO.67      | B     | 0.002            | 0.006  | 0.006  | 0.020            | 0.056  | 5.000  |
| RHPA.7       | B     | 4.600            | 9.970  | 0.465  | 32.100           | >50    | 4.730  |
| SC422.8      | B     | 0.241            | 0.542  | 3.180  | 8.170            | 18.100 | >50    |
| SF162.LS     | B     | >50              | >50    | >50    | >50              | >50    | >50    |
| SS1196.01    | B     | 0.020            | 0.147  | 0.017  | 0.338            | 1.150  | 0.935  |
| THRO.18      | B     | 4.570            | 4.870  | 0.809  | >50              | >50    | >50    |
| TRJO.58      | B     | 0.047            | 0.173  | 0.766  | 0.623            | 1.810  | 38.800 |
| TRO.11       | B     | 9.110            | >50    | 3.250  | >50              | >50    | >50    |
| WITO.33      | B     | 0.002            | 0.007  | 0.002  | 0.008            | 0.020  | 0.011  |
| YU2.DG       | B     | 1.940            | 2.080  | 0.150  | >50              | >50    | 16.800 |
| CH038.12     | BC    | 3.690            | 5.530  | 5.580  | >50              | >50    | >50    |
| CH070.1      | BC    | 0.001            | 0.006  | 0.002  | 0.004            | 0.018  | 0.008  |
| CH117.4      | BC    | 0.001            | 0.006  | 0.004  | 0.003            | 0.020  | 0.029  |
| CH181.12     | BC    | 0.001            | 0.004  | 0.001  | 0.006            | 0.019  | 0.003  |
| CNE15        | BC    | 0.001            | 0.005  | 0.001  | 0.004            | 0.018  | 0.006  |
| CNE19        | BC    | 0.004            | 0.015  | 0.035  | 0.028            | 0.068  | 1.980  |
| CNE20        | BC    | 0.038            | 0.047  | 3.220  | 0.188            | 0.163  | >50    |
| CNE21        | BC    | 0.033            | 0.063  | 0.120  | 0.191            | 0.397  | 20.200 |
| CNE40        | BC    | 0.731            | 0.812  | 6.930  | 9.870            | 7.710  | >50    |
| CNE7         | BC    | 0.394            | 1.020  | 0.148  | 1.860            | 4.280  | 1.750  |
| 286.36       | C     | 0.091            | 0.185  | 0.024  | 0.300            | 0.668  | 0.071  |
| 288.38       | C     | 3.300            | 2.420  | 0.564  | >50              | >50    | >50    |
| 0013095-2.11 | C     | 0.004            | 0.012  | 0.007  | 0.023            | 0.074  | 0.044  |
| 001428-2.42  | C     | 0.001            | 0.002  | 0.000  | 0.003            | 0.007  | 0.002  |
| 0077_V1.C16  | C     | 0.027            | 0.083  | 0.006  | 0.116            | 0.342  | 0.027  |
| 00836-2.5    | C     | >50              | >50    | >50    | >50              | >50    | >50    |
| 0921.V2.C14  | C     | 0.001            | 0.004  | 0.001  | 0.003            | 0.012  | 0.003  |
| 16055-2.3    | C     | 0.003            | 0.016  | 0.002  | 0.013            | 0.037  | 0.010  |
| 16845-2.22   | C     | 2.410            | 1.960  | 1.760  | 44.300           | >50    | >50    |
| 16936-2.21   | C     | >50              | >50    | >50    | >50              | >50    | >50    |
| 25710-2.43   | C     | 0.007            | 0.031  | 0.003  | 0.068            | 0.139  | 0.191  |
| 25711-2.4    | C     | 0.460            | 0.932  | 0.018  | 1.750            | 3.690  | 0.235  |
| 25925-2.22   | C     | 0.007            | 0.025  | 0.004  | 0.028            | 0.071  | 0.022  |
| 26191-2.48   | C     | 0.106            | 0.132  | 0.390  | 0.950            | 0.809  | >50    |
| 3168.V4.C10  | C     | 0.043            | 0.092  | 0.025  | 0.150            | 0.393  | 0.201  |
| 3637.V5.C3   | C     | >50              | >50    | >50    | >50              | >50    | >50    |
| 3873.V1.C24  | C     | >50              | >50    | >50    | >50              | >50    | >50    |
| 6322.V4.C1   | C     | >50              | >50    | >50    | >50              | >50    | >50    |
| 6471.V1.C16  | C     | >50              | >50    | >50    | >50              | >50    | >50    |
| 6631.V3.C10  | C     | >50              | >50    | >50    | >50              | >50    | >50    |
| 6644.V2.C33  | C     | 0.003            | 0.025  | >50    | 0.029            | 0.103  | >50    |
| 6785.V5.C14  | C     | 0.001            | 0.008  | 0.002  | 0.007            | 0.043  | 0.020  |
| 6838.V1.C35  | C     | 0.000            | 0.006  | 0.001  | 0.003            | 0.032  | 0.004  |
| 96ZM651.02   | C     | >50              | >50    | >50    | >50              | >50    | >50    |
| BR025.9      | C     | 0.004            | 0.019  | 0.004  | 0.022            | 0.065  | 0.024  |
| CAP210.E8    | C     | 0.057            | 0.165  | 0.023  | 0.412            | 0.876  | 0.736  |
| CAP244.D3    | C     | 0.017            | 0.067  | 0.009  | 0.102            | 0.231  | 0.037  |

| Virus ID         | Clade | IC <sub>50</sub> |        |        | IC <sub>80</sub> |        |        |
|------------------|-------|------------------|--------|--------|------------------|--------|--------|
|                  |       | PG9,16-RSH       | PG9    | PG16   | PG9,16-RSH       | PG9    | PG16   |
| CAP45.G3         | C     | 0.000            | 0.003  | 0.001  | 0.002            | 0.010  | 0.002  |
| CNE30            | C     | >50              | >50    | >50    | >50              | >50    | >50    |
| CNE31            | C     | 19.700           | 15.800 | 3.190  | >50              | >50    | >50    |
| CNE53            | C     | 0.054            | 0.080  | >50    | 0.235            | 0.430  | >50    |
| CNE58            | C     | 0.007            | 0.022  | 0.004  | 0.035            | 0.064  | 0.019  |
| DU123.06         | C     | 0.030            | 0.062  | 0.010  | 0.154            | 0.315  | 0.064  |
| DU151.02         | C     | 0.003            | 0.016  | 0.002  | 0.016            | 0.054  | 0.007  |
| DU156.12         | C     | 0.014            | 0.041  | 0.003  | 0.079            | 0.143  | 0.016  |
| DU172.17         | C     | 0.071            | 0.190  | 0.015  | 0.278            | 0.758  | 0.080  |
| DU422.01         | C     | >50              | >50    | >50    | >50              | >50    | >50    |
| MW965.26         | C     | 0.860            | 0.619  | 0.123  | >50              | 26.000 | >50    |
| SO18.18          | C     | 0.006            | 0.021  | 0.003  | 0.033            | 0.065  | 0.021  |
| TV1.29           | C     | 0.002            | 0.005  | 0.002  | 0.008            | 0.027  | 0.050  |
| TZA125.17        | C     | 0.034            | 0.140  | 0.031  | 0.281            | 0.808  | 1.960  |
| TZBD.02          | C     | 0.032            | 0.170  | 0.010  | 0.215            | 0.676  | 0.082  |
| ZA012.29         | C     | 9.120            | 7.470  | 4.770  | >50              | >50    | >50    |
| ZM106.9          | C     | 0.526            | 0.492  | 0.482  | 6.290            | 4.190  | >50    |
| ZM109.4          | C     | 0.041            | 0.154  | 10.000 | 0.502            | 2.440  | >50    |
| ZM135.10a        | C     | >50              | >50    | >50    | >50              | >50    | >50    |
| ZM176.66         | C     | 0.003            | 0.010  | 0.001  | 0.012            | 0.033  | 0.005  |
| ZM197.7          | C     | 0.164            | 0.369  | 0.434  | 1.100            | 2.130  | 9.790  |
| ZM214.15         | C     | >50              | >50    | >50    | >50              | >50    | >50    |
| ZM215.8          | C     | 0.065            | 0.073  | >50    | 0.517            | 0.497  | >50    |
| ZM233.6          | C     |                  |        |        |                  |        |        |
| ZM249.1          | C     | 0.015            | 0.043  | 0.013  | 0.209            | 0.267  | 1.820  |
| ZM53.12          | C     | 0.020            | 0.036  | 0.003  | 0.106            | 0.129  | 0.020  |
| ZM55.28a         | C     | 5.370            | 3.150  | >50    | >50              | >50    | >50    |
| 3326.V4.C3       | CD    | 0.009            | 0.030  | 0.011  | 0.053            | 0.103  | 0.094  |
| 3337.V2.C6       | CD    | >50              | >50    | >50    | >50              | >50    | >50    |
| 3817.v2.c59      | CD    | 0.001            | 0.004  | 0.002  | 0.003            | 0.015  | 0.016  |
| 191821.E6.1      | D     | 1.810            | 5.540  | >50    | >50              | >50    | >50    |
| 231965.c1        | D     | 0.845            | 0.682  | 2.540  | >50              | >50    | >50    |
| 231966.c02       | D     |                  |        |        |                  |        |        |
| 247-23           | D     | 0.075            | 0.092  | 4.230  | 0.441            | 0.422  | >50    |
| 3016.v5.c45      | D     | 0.207            | 0.283  | >50    | 16.900           | 12.600 | >50    |
| 57128.vrc15      | D     | 0.035            | 0.122  | 0.137  | 0.356            | 0.465  | >50    |
| 6405.v4.c34      | D     | >50              | >50    | >50    | >50              | >50    | >50    |
| A03349M1.vrc4a   | D     | >50              | >50    | >50    | >50              | >50    | >50    |
| A07412M1.vrc12   | D     | 1.140            | 0.773  | 5.970  | >50              | 17.900 | >50    |
| NKU3006.ec1      | D     | >50              | >50    | >50    | >50              | >50    | >50    |
| UG021.16         | D     |                  |        |        |                  |        |        |
| UG024.2          | D     | 6.070            | 2.420  | >50    | >50              | >50    | >50    |
| P0402.c2.11      | G     | 0.940            | 0.502  | 0.092  | 18.100           | 6.150  | 20.300 |
| P1981.C5.3       | G     | 0.085            | 0.201  | 0.953  | 2.100            | 2.680  | >50    |
| X1193.c1         | G     | 0.036            | 0.120  | 0.016  | 0.145            | 0.378  | 0.115  |
| X1254.c3         | G     | 0.019            | 0.035  | 0.011  | 0.135            | 0.125  | 0.106  |
| X1632.S2.B10     | G     | 0.043            | 0.087  | 0.007  | 0.484            | 0.849  | 0.102  |
| X2088.c9         | G     | >50              | >50    | >50    | >50              | >50    | >50    |
| X2131.C1.B5      | G     |                  |        |        |                  |        |        |
| SIVmac251.30.SG3 | NA    | >50              | >50    | >50    | >50              | >50    | >50    |
| SVA.MLV          | NA    | >50              | >50    | >50    | >50              | >50    | >50    |

B. IC<sub>50</sub> and IC<sub>80</sub> statistics on a panel of 195 isolates

|                             | PG9,16-RSH | PG9   | PG16  |
|-----------------------------|------------|-------|-------|
| <b># Viruses</b>            | 195        | 195   | 195   |
| <b>Total VS Neutralized</b> |            |       |       |
| <b>IC50 &lt;50ug/ml</b>     | 157        | 156   | 147   |
| <b>IC50 &lt;1ug/ml</b>      | 138        | 133   | 122   |
| <b>% VS Neutralized</b>     |            |       |       |
| <b>IC50 &lt;50ug/ml</b>     | 81         | 80    | 75    |
| <b>IC50 &lt;1ug/ml</b>      | 71         | 68    | 63    |
| <b>Median IC50</b>          | 0.033      | 0.082 | 0.018 |
| <b>Geometric Mean</b>       | 0.038      | 0.093 | 0.042 |

|                             | PG9,16-RSH | PG9   | PG16  |
|-----------------------------|------------|-------|-------|
| <b># Viruses</b>            | 195        | 195   | 195   |
| <b>Total VS Neutralized</b> |            |       |       |
| <b>IC80 &lt;50ug/ml</b>     | 139        | 137   | 103   |
| <b>IC80 &lt;1ug/ml</b>      | 108        | 100   | 77    |
| <b>% VS Neutralized</b>     |            |       |       |
| <b>IC80 &lt;50ug/ml</b>     | 71         | 70    | 53    |
| <b>IC80 &lt;1ug/ml</b>      | 55         | 51    | 39    |
| <b>Median IC80</b>          | 0.145      | 0.315 | 0.080 |
| <b>Geometric Mean</b>       | 0.155      | 0.311 | 0.136 |

C. Correlation between PG9,16-RSH improvement as a function of PG9 potency on 195 viruses.

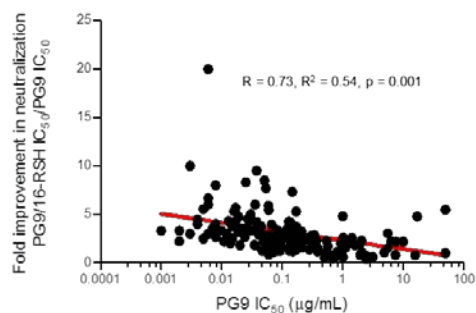

**Supplementary Table 4. NMR chemical shifts**

A. <sup>1</sup>H chemical shifts of complex-type glycan

| Glycan rings | <sup>1</sup> H chemical shifts |              |                        |       |       |              |        |       |
|--------------|--------------------------------|--------------|------------------------|-------|-------|--------------|--------|-------|
|              | H1                             | H2           | H3                     | H4    | H5    | H6/H6'       | H9/H9' | Ac    |
| A            | 4.955                          | 3.747        | 3.646                  | 3.544 | 3.471 | 3.524, 3.72  |        | 1.905 |
| B            | 4.5403                         | 3.677        | 3.646                  | 3.612 | 3.494 | 3.524, 3.720 |        | 1.972 |
| C            | 4.66                           | 4.140        | 3.664                  | 3.667 | 3.552 | 3.670, 3.843 |        |       |
| D            | 5.018                          | 4.082        | 3.785                  | 3.384 | 3.496 | 3.520, 3.757 |        |       |
| E            | 4.830                          | 4.00         | 3.781                  | 3.384 | 3.496 | 3.508, 3.786 |        |       |
| F            | 4.489                          | 3.638        | 3.64                   | 3.542 | 3.548 | 3.722, 3.860 |        | 1.958 |
| G            | 4.333, 4.35                    | 3.424        | 3.556                  | 3.812 | 3.706 | 3.876, 3.431 |        |       |
| Sia          |                                |              | Ax, 1.599<br>Eq, 2.552 | 3.539 | 3.688 | 3.581        | 3.585  | 1.92  |
| Asn          | 3.799                          | 2.776, 2.683 |                        |       |       |              |        |       |

B. <sup>13</sup>C chemical shifts of complex-type glycan

| Glycan rings | <sup>13</sup> C chemical shifts |       |        |       |       |       |       |       |
|--------------|---------------------------------|-------|--------|-------|-------|-------|-------|-------|
|              | C1                              | C2    | C3     | C4    | C5    | C6    | C9    | Ac    |
| A            | 77.94                           | 53.46 | 72.67  | 78.5  | 76.06 | 59.74 |       | 21.95 |
| B            | 101.18                          | 54.80 | 71.92  | 79.49 | 74.31 | 59.85 |       | 21.95 |
| C            | 100.32                          | 70.14 | 80.36  | 65.52 | 74.17 | 65.77 |       |       |
| D            | 99.41                           | 76.25 | 69.301 | 67.15 | 72.71 | 62.51 |       |       |
| E            | 96.82                           | 76.08 | 69.32  | 67.15 | 72.71 | 61.53 |       |       |
| F            | 99.18                           | 54.50 | 71.95  | 80.56 | 74.3  | 60.11 |       | 22.14 |
| G            | 103.42, 102.8                   | 70.64 | 72.31  | 73.57 | 73.57 | 63.21 |       |       |
| Sia          |                                 |       | 39.94  | 68.12 | 51.76 | 72.41 | 69.47 | 22.34 |
| Asn          | 51.07                           | 35.67 |        |       |       |       |       |       |

C. <sup>1</sup>H chemical shifts of Man<sub>5</sub>GlcNAc<sub>2</sub>

| Glycan rings | <sup>1</sup> H chemical shifts |       |       |       |       |               |
|--------------|--------------------------------|-------|-------|-------|-------|---------------|
|              | H1                             | H2    | H3    | H4    | H5    | H6, H6'       |
| A $\alpha$   | 5.063                          | 3.752 | 3.762 | 3.505 | 3.755 |               |
| A $\beta$    | 4.51                           | 3.573 | 3.551 | 3.495 | 3.385 | 3.521, 3.708  |
| B            | 4.521                          | 3.703 | 3.698 | 3.653 | 3.520 |               |
| C            | 4.702                          | 4.171 | 3.685 | 3.709 | 3.560 | 3.875/3.696   |
| D            | 4.792                          | 4.065 | 3.840 | 3.785 | 3.772 | 3.9109, 3.660 |
| E            | 5.0143                         | 3.990 | 3.809 | 3.555 | 3.733 | 3.660, 3.831  |
| F            | 5.001                          | 3.985 | 3.809 | 3.57  | 3.696 | 3.687, 3.807  |
| G            | 4.826                          | 3.904 | 3.752 | 3.591 | 3.608 |               |

Individual rings are labeled as shown in Fig. 5b.

D. <sup>13</sup>C chemical shifts of Man<sub>5</sub>GlcNAc<sub>2</sub>

| Glycan rings | <sup>13</sup> C chemical shifts |       |        |       |       |        |
|--------------|---------------------------------|-------|--------|-------|-------|--------|
|              | C1                              | C2    | C3     | C4    | C5    | C6     |
| A $\alpha$   | 90.27                           | 53.52 | 69.12  | 79.58 | 69.2  |        |
| A $\beta$    | 94.68                           | 55.94 | 72.38  | 79.13 | 74.44 | 59.95  |
| B            | 101.31                          | 54.89 | 71.924 | 79.48 | 74.44 |        |
| C            | 100.34                          | 70.14 | 80.56  | 65.42 | 74.31 | 65.93  |
| D            | 99.8                            | 69.38 | 78.57  | 65.59 | 70.78 | 65.131 |
| E            | 102.44                          | 69.95 | 70.3   | 66.81 | 77.81 | 61.067 |
| F            | 102.2                           | 70.05 | 70.3   | 66.7  | 73.26 | 60.94  |
| G            | 99.2                            | 69.88 | 70.52  | 66.66 | 72.64 |        |

Individual rings are labeled as shown in Fig. 5b.

## Supplementary Note

**ELISAs. *PG9 and PG16 detection.*** 2 $\mu$ g/mL of scaffolded V1/V2 were coated overnight in PBS at 4°C. Plates were washed once with PBS tween 0.2% and blocked for 2 hours at room temperature (5% skim milk in PBS). Antibodies (PG9 and PG16) were added starting at 10 $\mu$ g/ml with 5-fold dilution in PBS tween 0.2% for 1 hour. Plates were washed 5 times in PBS tween 0.05%. Secondary antihuman peroxidase conjugate antibody at 1:5,000 dilution was added to the plate for 1 hour. The plates were washed 5 times in PBS Tween 0.05%. Plates were developed using 3,3',5,5'-tetramethylbenzidine (TMB) (Kirkegaard & Perry Laboratories) for 10 minutes and the reaction was stopped with 180nM H<sub>2</sub>SO<sub>4</sub>. The readout was measured at a wavelength of 450nm. All samples were tested in duplicate.

***Lectin detection.*** Scaffolded-V1/V2 was coated overnight in PBS at 4°C. Wells were blocked using Carbo free block from Vector Biolaboratories. Biotinylated lectins were added to the wells for 1 hour at RT in PBS tween 0.2% and then washed 5 times in PBS tween 0.05%. Vecstatin was added for 1 hour at RT. Plates were washed in PBS Tween 0.05% and developed using TMB. The average absorbance over multiple wells after subtraction of background reactivity is shown for each lectin with standard deviations from the mean as error bars. Some background noise was observed for SN lectin binding to the plate. Sambucus nigra lectin (S)N binds preferentially to Sia( $\alpha$ 2-6)Gal, and to a lesser degree Sia( $\alpha$ 2-3)Gal. Maackia amurensis lectin II (MA) prefers to bind sialic acid in an ( $\alpha$ 2-3) linkage. CVN recognizes any glycans that contain  $\alpha$ 1-2 linked – mannobiose, which are present on Man-7 through Man-9. Con A interacts with branched  $\alpha$ -mannosides present in high-mannose type, hybrid type and biantennary complex type *N*-glycans.
